# Supplementary material
Source: MDPI journal article supplement (https://www.mdpi.com/2073-4441/15/3/459)
Supplement: s1 [file s1]

**Table S1.** Error estimation summary results in PMF model.

| Error Estimation  |                        |                      |                         |                          |          |
|-------------------|------------------------|----------------------|-------------------------|--------------------------|----------|
| DISP Diagnostics: | Error Code:            | 0                    |                         |                          |          |
|                   | Largest Decrease in Q: | -0.053               |                         |                          |          |
|                   | %dQ:                   | -0.0052              |                         |                          |          |
|                   | Swaps by Factor:       | 0                    | 0                       | 0                        |          |
| BS Mapping:       |                        | Industrial emissions | Technical PCBs mixtures | Coal and wood combustion | Unmapped |
|                   | Boot Factor 1          | 100                  | 0                       | 0                        | 0        |
|                   | Boot Factor 2          | 0                    | 100                     | 0                        | 0        |
|                   | Boot Factor 3          | 0                    | 6                       | 90                       | 4        |

**Table S2.** Statistical summary of the measured PCBs during the study (ng L<sup>-1</sup>).

| PCBs   | AVG <sup>a</sup>       | SD <sup>b</sup>        | Min <sup>c</sup>      | Max <sup>d</sup>       | Det. freq. <sup>e</sup> |
|--------|------------------------|------------------------|-----------------------|------------------------|-------------------------|
| PCB8   | $2.29 \times 10^{-3}$  | $39.96 \times 10^{-4}$ | ND                    | $1.52 \times 10^{-2}$  | 35.29%                  |
| PCB18  | $3.24 \times 10^{-4}$  | $13.34 \times 10^{-4}$ | ND                    | $0.55 \times 10^{-2}$  | 5.88%                   |
| PCB28  | $2.47 \times 10^{-3}$  | $23.55 \times 10^{-4}$ | ND                    | $0.72 \times 10^{-2}$  | 64.71%                  |
| PCB44  | $3.47 \times 10^{-3}$  | $47.69 \times 10^{-4}$ | ND                    | $1.58 \times 10^{-2}$  | 41.18%                  |
| PCB52  | $1.92 \times 10^{-3}$  | $43.96 \times 10^{-4}$ | ND                    | $1.39 \times 10^{-2}$  | 17.65%                  |
| PCB66  | $2.47 \times 10^{-3}$  | $35.43 \times 10^{-4}$ | ND                    | $1.16 \times 10^{-2}$  | 41.18%                  |
| PCB77  | $9.88 \times 10^{-3}$  | $15.04 \times 10^{-3}$ | ND                    | $4.51 \times 10^{-2}$  | 35.29%                  |
| PCB81  | $2.13 \times 10^{-3}$  | $4.95 \times 10^{-3}$  | ND                    | $1.67 \times 10^{-2}$  | 17.65%                  |
| PCB101 | $7.89 \times 10^{-3}$  | $17.1 \times 10^{-3}$  | ND                    | $7.02 \times 10^{-2}$  | 52.94%                  |
| PCB105 | $6.22 \times 10^{-3}$  | $48.13 \times 10^{-4}$ | ND                    | $1.38 \times 10^{-2}$  | 76.47%                  |
| PCB114 | $5.68 \times 10^{-3}$  | $47.03 \times 10^{-4}$ | ND                    | $1.77 \times 10^{-2}$  | 94.12%                  |
| PCB118 | $7.75 \times 10^{-3}$  | $16.95 \times 10^{-3}$ | ND                    | $6.89 \times 10^{-2}$  | 35.29%                  |
| PCB123 | $6.23 \times 10^{-3}$  | $85.52 \times 10^{-4}$ | ND                    | $3.16 \times 10^{-2}$  | 52.94%                  |
| PCB126 | $8.52 \times 10^{-3}$  | $10.58 \times 10^{-3}$ | ND                    | $3.58 \times 10^{-2}$  | 82.35%                  |
| PCB128 | $15.45 \times 10^{-2}$ | $23.39 \times 10^{-3}$ | ND                    | $86.35 \times 10^{-2}$ | 94.12%                  |
| PCB138 | $12.17 \times 10^{-3}$ | $23.23 \times 10^{-3}$ | ND                    | $9.72 \times 10^{-2}$  | 64.71%                  |
| PCB153 | $5.75 \times 10^{-3}$  | $15.35 \times 10^{-3}$ | ND                    | $5.99 \times 10^{-2}$  | 17.65%                  |
| PCB156 | $3.35 \times 10^{-3}$  | $46.47 \times 10^{-4}$ | ND                    | $1.77 \times 10^{-2}$  | 52.94%                  |
| PCB157 | $0.48 \times 10^{-2}$  | $60.22 \times 10^{-4}$ | ND                    | $2.13 \times 10^{-2}$  | 58.82%                  |
| PCB167 | $40.06 \times 10^{-4}$ | $68.92 \times 10^{-4}$ | ND                    | $2.86 \times 10^{-2}$  | 64.71%                  |
| PCB169 | $68.76 \times 10^{-4}$ | $96.72 \times 10^{-4}$ | ND                    | $4.27 \times 10^{-2}$  | 88.24%                  |
| PCB170 | $45.06 \times 10^{-4}$ | $43.36 \times 10^{-4}$ | ND                    | $1.66 \times 10^{-2}$  | 76.47%                  |
| PCB180 | $0.54 \times 10^{-2}$  | $88.98 \times 10^{-4}$ | ND                    | $3.7 \times 10^{-2}$   | 58.82%                  |
| PCB187 | $52.65 \times 10^{-4}$ | $10.27 \times 10^{-3}$ | ND                    | $3.34 \times 10^{-2}$  | 29.41%                  |
| PCB189 | $94.76 \times 10^{-4}$ | $21.68 \times 10^{-3}$ | ND                    | $9.31 \times 10^{-2}$  | 94.12%                  |
| PCB195 | $16.06 \times 10^{-3}$ | $27.85 \times 10^{-3}$ | ND                    | $12.05 \times 10^{-2}$ | 88.24%                  |
| PCB206 | $21.68 \times 10^{-3}$ | $21.66 \times 10^{-3}$ | ND                    | $9.05 \times 10^{-2}$  | 94.12%                  |
| PCB209 | $53.12 \times 10^{-3}$ | $77.45 \times 10^{-3}$ | ND                    | $23.11 \times 10^{-2}$ | 35.29%                  |
| PCBs   | $37.42 \times 10^{-2}$ | $46.74 \times 10^{-2}$ | $6.49 \times 10^{-2}$ | 1.92                   |                         |

<sup>a</sup> AVG: average; <sup>b</sup> SD: standard deviation, <sup>c</sup> Min minimum, <sup>d</sup> Max maximum, <sup>e</sup> Det. freq. detection frequencies.

**Table S3.** The homolog groups of detected PCBs.

| <b>Homolog groups</b> | <b>PCBs</b>                                            |
|-----------------------|--------------------------------------------------------|
| 2-PCB                 | PCB8                                                   |
| 3-PCB                 | PCB18, PCB28                                           |
| 4-PCB                 | PCB44, PCB52, PCB66, PCB 77, PCB81                     |
| 5-PCB                 | PCB101, PCB105, PCB114, PCB118, PCB123, PCB126         |
| 6-PCB                 | PCB128, PCB138, PCB153, PCB156, PCB157, PCB167, PCB169 |
| 7-PCB                 | PCB170, PCB180, PCB187, PCB189                         |
| 8-PCB                 | PCB195                                                 |
| 9-PCB                 | PCB206                                                 |
| 10-PCB                | PCB209                                                 |

**Table S4.** The PNECs values corresponding to the concentrations of individual PCBs (ng L<sup>-1</sup>).

| Substance | PN EC | B1                     | B2                     | B3                     | B4                     | B5                     | B6                     | B7                     | B8                     | B9                     | B10                    | B11                    | B12                    | B13                    | B14                    | B15 | B16                    | B17                    |
|-----------|-------|------------------------|------------------------|------------------------|------------------------|------------------------|------------------------|------------------------|------------------------|------------------------|------------------------|------------------------|------------------------|------------------------|------------------------|-----|------------------------|------------------------|
| PCB8      | 253   | 0                      | $6.01 \times 10^{-5}$  | $1.90 \times 10^{-5}$  | 0                      | 0                      | 0                      | 0                      | $2.13 \times 10^{-5}$  | 0                      | $1.78 \times 10^{-5}$  | 0                      | $1.86 \times 10^{-5}$  | 0                      | 0                      | 0   | 0                      | $1.74 \times 10^{-5}$  |
| PCB18     | 33.8  | 0                      | 0                      | 0                      | 0                      | 0                      | 0                      | 0                      | $16.27 \times 10^{-5}$ | 0                      | 0                      | 0                      | 0                      | 0                      | 0                      | 0   | 0                      | 0                      |
| PCB28     | 46.3  | 0                      | $15.55 \times 10^{-5}$ | $8.86 \times 10^{-5}$  | 0                      | 0                      | 0                      | $5.4 \times 10^{-5}$   | $12.53 \times 10^{-5}$ | $4.54 \times 10^{-5}$  | $7.99 \times 10^{-5}$  | 0                      | $12.1 \times 10^{-5}$  | $9.72 \times 10^{-5}$  | $4.32 \times 10^{-5}$  | 0   | $4.32 \times 10^{-5}$  | $5.4 \times 10^{-5}$   |
| PCB44     | 26    | 0                      | $36.15 \times 10^{-5}$ | $28.08 \times 10^{-5}$ | 0                      | 0                      | 0                      | 0                      | $21.15 \times 10^{-5}$ | 0                      | $25.77 \times 10^{-5}$ | $26.92 \times 10^{-5}$ | $60.77 \times 10^{-5}$ | 0                      | 0                      | 0   | 0                      | $28.08 \times 10^{-5}$ |
| PCB52     | 3     | 0                      | $26.67 \times 10^{-4}$ | 0                      | 0                      | 0                      | 0                      | 0                      | 0                      | 0                      | $46.33 \times 10^{-4}$ | 0                      | $35.67 \times 10^{-4}$ | 0                      | 0                      | 0   | 0                      | 0                      |
| PCB66     | 12.6  | $37.3 \times 10^{-5}$  | $92.06 \times 10^{-5}$ | $30.95 \times 10^{-5}$ | 0                      | 0                      | 0                      | $26.98 \times 10^{-5}$ | $30.95 \times 10^{-5}$ | 0                      | $52.38 \times 10^{-5}$ | 0                      | 0                      | $62.7 \times 10^{-5}$  | 0                      | 0   | 0                      | 0                      |
| PCB77     | 0.3   | $4.9 \times 10^{-2}$   | $0.83 \times 10^{-1}$  | $0.81 \times 10^{-1}$  | 0                      | 0                      | 0                      | 0                      | 0                      | 0                      | 0                      | 0                      | $76.67 \times 10^{-3}$ | $15.03 \times 10^{-2}$ | 0.12                   | 0   | 0                      | 0                      |
| PCB81     | 11.5  | 0                      | 0                      | 0                      | 0                      | 0                      | 0                      | 0                      | 0                      | 0                      | $14.52 \times 10^{-4}$ | 0                      | 0                      | 0                      | $82.61 \times 10^{-5}$ | 0   | 0                      | $86.96 \times 10^{-5}$ |
| PCB101    | 10    | $3.9 \times 10^{-4}$   | $7.02 \times 10^{-3}$  | $9.8 \times 10^{-4}$   | 0                      | $0.41 \times 10^{-3}$  | 0                      | 0                      | $3.9 \times 10^{-4}$   | 0                      | $2.28 \times 10^{-3}$  | $0.29 \times 10^{-3}$  | $0.79 \times 10^{-3}$  | $0.86 \times 10^{-3}$  | 0                      | 0   | 0                      | 0                      |
| PCB105    | 8.1   | $12.59 \times 10^{-4}$ | $12.1 \times 10^{-4}$  | $16.42 \times 10^{-4}$ | $12.47 \times 10^{-4}$ | $17.04 \times 10^{-4}$ | $37.04 \times 10^{-5}$ | $11.48 \times 10^{-4}$ | $28.4 \times 10^{-5}$  | $43.21 \times 10^{-5}$ | $97.53 \times 10^{-5}$ | $55.56 \times 10^{-5}$ | $10.37 \times 10^{-4}$ | 0                      | $11.85 \times 10^{-4}$ | 0   | 0                      | 0                      |
| PCB114    | 3     | $10.33 \times 10^{-4}$ | $0.59 \times 10^{-2}$  | $18.67 \times 10^{-4}$ | $10.33 \times 10^{-4}$ | $10.67 \times 10^{-4}$ | $10.67 \times 10^{-4}$ | $0.11 \times 10^{-2}$  | $10.33 \times 10^{-4}$ | $0.18 \times 10^{-2}$  | $0.45 \times 10^{-2}$  | $22.33 \times 10^{-4}$ | $0.45 \times 10^{-2}$  | $15.67 \times 10^{-4}$ | $0.12 \times 10^{-2}$  | 0   | $10.67 \times 10^{-4}$ | $0.12 \times 10^{-2}$  |

|            |          |                            |                            |                            |                            |                            |                            |                            |                            |                            |                            |                            |                            |                            |                            |                            |                            |                            |
|------------|----------|----------------------------|----------------------------|----------------------------|----------------------------|----------------------------|----------------------------|----------------------------|----------------------------|----------------------------|----------------------------|----------------------------|----------------------------|----------------------------|----------------------------|----------------------------|----------------------------|----------------------------|
| PCB11<br>8 | 1        | 0                          | 6.89×<br>10 <sup>-2</sup>  | 0                          | 0                          | 0                          | 0                          | 0                          | 1.74×<br>10 <sup>-2</sup>  | 0                          | 1.71×<br>10 <sup>-2</sup>  | 0                          | 0.87×<br>10 <sup>-2</sup>  | 0                          | 0.82×<br>10 <sup>-2</sup>  | 0                          | 0                          | 1.15×<br>10 <sup>-2</sup>  |
| PCB12<br>3 | 5.6      | 0                          | 10.36<br>×10 <sup>-4</sup> | 25.36<br>×10 <sup>-4</sup> | 1.25×<br>10 <sup>-3</sup>  | 0                          | 0                          | 13.75<br>×10 <sup>-4</sup> | 0                          | 0                          | 56.43<br>×10 <sup>-4</sup> | 0                          | 0                          | 13.57<br>×10 <sup>-4</sup> | 10.89<br>×10 <sup>-4</sup> | 0                          | 13.57<br>×10 <sup>-4</sup> | 32.68<br>×10 <sup>-4</sup> |
| PCB12<br>6 | 0.3      | 15.33×<br>10 <sup>-3</sup> | 1.14×<br>10 <sup>-1</sup>  | 0.09×<br>10 <sup>-1</sup>  | 0.09×<br>10 <sup>-1</sup>  | 0                          | 0                          | 14.67<br>×10 <sup>-3</sup> | 22.67<br>×10 <sup>-3</sup> | 14.67<br>×10 <sup>-3</sup> | 11.93<br>×10 <sup>-2</sup> | 38.33<br>×10 <sup>-3</sup> | 0.28×<br>10 <sup>-1</sup>  | 31.67<br>×10 <sup>-3</sup> | 0.02                       | 0                          | 10.67<br>×10 <sup>-3</sup> | 35.33<br>×10 <sup>-3</sup> |
| PCB12<br>8 | 0.6      | 17.57×<br>10 <sup>-2</sup> | 1.44                       | 0.18                       | 39.33<br>×10 <sup>-3</sup> | 62.83<br>×10 <sup>-3</sup> | 50.83<br>×10 <sup>-3</sup> | 10.45<br>×10 <sup>-2</sup> | 68.25<br>×10 <sup>-2</sup> | 44.17<br>×10 <sup>-3</sup> | 17.67<br>×10 <sup>-2</sup> | 10.62<br>×10 <sup>-2</sup> | 92.18<br>×10 <sup>-2</sup> | 96.33<br>×10 <sup>-3</sup> | 0                          | 57.33<br>×10 <sup>-3</sup> | 76.67<br>×10 <sup>-3</sup> | 16.28<br>×10 <sup>-2</sup> |
| PCB13<br>8 | 1        | 6.1×<br>10 <sup>-3</sup>   | 9.72×<br>10 <sup>-2</sup>  | 0.61×<br>10 <sup>-2</sup>  | 0                          | 0                          | 2.47×<br>10 <sup>-2</sup>  | 0                          | 0.89×<br>10 <sup>-2</sup>  | 0                          | 1.61×<br>10 <sup>-2</sup>  | 1.06×<br>10 <sup>-2</sup>  | 0.52×<br>10 <sup>-2</sup>  | 0.58×<br>10 <sup>-2</sup>  | 0                          | 0.41×<br>10 <sup>-2</sup>  | 0                          | 2.21×<br>10 <sup>-2</sup>  |
| PCB15<br>3 | 1.3      | 0                          | 46.08<br>×10 <sup>-3</sup> | 0                          | 0                          | 0                          | 0                          | 0                          | 0                          | 0                          | 0                          | 0                          | 17.46<br>×10 <sup>-3</sup> | 0                          | 0                          | 0                          | 0                          | 11.69<br>×10 <sup>-3</sup> |
| PCB15<br>6 | 3.3      | 0                          | 13.33<br>×10 <sup>-4</sup> | 0                          | 12.73<br>×10 <sup>-3</sup> | 0                          | 0                          | 0                          | 0                          | 0                          | 53.64<br>×10 <sup>-4</sup> | 13.94<br>×10 <sup>-4</sup> | 0.03×<br>10 <sup>-1</sup>  | 14.24<br>×10 <sup>-4</sup> | 90.91<br>×10 <sup>-5</sup> | 0                          | 12.12<br>×10 <sup>-4</sup> | 13.33<br>×10 <sup>-4</sup> |
| PCB15<br>7 | 2.4      | 0                          | 88.75<br>×10 <sup>-4</sup> | 28.33<br>×10 <sup>-4</sup> | 0                          | 11.25<br>×10 <sup>-4</sup> | 0                          | 0                          | 11.67<br>×10 <sup>-4</sup> | 0                          | 33.75<br>×10 <sup>-4</sup> | 23.75<br>×10 <sup>-4</sup> | 59.17<br>×10 <sup>-4</sup> | 37.08<br>×10 <sup>-4</sup> | 11.25<br>×10 <sup>-4</sup> | 0                          | 0                          | 0.35×<br>10 <sup>-2</sup>  |
| PCB16<br>7 | 2.7      | 11.11×<br>10 <sup>-4</sup> | 10.59<br>×10 <sup>-3</sup> | 10.74<br>×10 <sup>-4</sup> | 0                          | 0                          | 70.37<br>×10 <sup>-5</sup> | 0                          | 31.48<br>×10 <sup>-4</sup> | 0                          | 11.85<br>×10 <sup>-4</sup> | 32.96<br>×10 <sup>-4</sup> | 12.96<br>×10 <sup>-4</sup> | 11.85<br>×10 <sup>-4</sup> | 0                          | 81.48<br>×10 <sup>-5</sup> | 81.48<br>×10 <sup>-5</sup> | 0                          |
| PCB16<br>9 | 11.<br>7 | 22.22×<br>10 <sup>-5</sup> | 36.5×<br>10 <sup>-4</sup>  | 83.76<br>×10 <sup>-5</sup> | 32.48<br>×10 <sup>-5</sup> | 44.44<br>×10 <sup>-5</sup> | 0                          | 25.64<br>×10 <sup>-5</sup> | 38.46<br>×10 <sup>-5</sup> | 24.79<br>×10 <sup>-5</sup> | 77.78<br>×10 <sup>-5</sup> | 56.41<br>×10 <sup>-5</sup> | 65.81<br>×10 <sup>-5</sup> | 59.83<br>×10 <sup>-5</sup> | 58.97<br>×10 <sup>-5</sup> | 0                          | 23.93<br>×10 <sup>-5</sup> | 19.66<br>×10 <sup>-5</sup> |
| PCB17<br>0 | 0.8      | 9.25×<br>10 <sup>-3</sup>  | 20.75<br>×10 <sup>-3</sup> | 0.09×<br>10 <sup>-1</sup>  | 0                          | 3.25×<br>10 <sup>-3</sup>  | 0                          | 28.75<br>×10 <sup>-4</sup> | 0.13×<br>10 <sup>-1</sup>  | 0.45×<br>10 <sup>-2</sup>  | 28.75<br>×10 <sup>-4</sup> | 0                          | 7.63×<br>10 <sup>-3</sup>  | 68.75<br>×10 <sup>-4</sup> | 31.25<br>×10 <sup>-4</sup> | 56.25<br>×10 <sup>-4</sup> | 0                          | 0.07×<br>10 <sup>-1</sup>  |
| PCB18<br>0 | 1        | 10.9×<br>10 <sup>-3</sup>  | 3.7×<br>10 <sup>-2</sup>   | 0.35×<br>10 <sup>-2</sup>  | 0                          | 0.36×<br>10 <sup>-2</sup>  | 0                          | 0                          | 0.49×<br>10 <sup>-2</sup>  | 0                          | 0.57×<br>10 <sup>-2</sup>  | 0.58×<br>10 <sup>-2</sup>  | 1.03×<br>10 <sup>-2</sup>  | 0.04×<br>10 <sup>-1</sup>  | 0.61×<br>10 <sup>-2</sup>  | 0                          | 0                          | 0                          |
| PCB18<br>7 | 1.7      | 0                          | 16.06<br>×10 <sup>-3</sup> | 0                          | 0                          | 0                          | 0                          | 0                          | 66.47<br>×10 <sup>-4</sup> | 34.71<br>×10 <sup>-4</sup> | 19.65<br>×10 <sup>-3</sup> | 0                          | 0                          | 0                          | 0                          | 0                          | 0                          | 68.24<br>×10 <sup>-4</sup> |

|       |     |                        |      |      |                        |                        |                        |                        |                       |                        |                       |                        |                        |                       |                       |                       |                       |                       |
|-------|-----|------------------------|------|------|------------------------|------------------------|------------------------|------------------------|-----------------------|------------------------|-----------------------|------------------------|------------------------|-----------------------|-----------------------|-----------------------|-----------------------|-----------------------|
| PCB18 | 0.4 | $1.15 \times 10^{-2}$  | 0.23 | 0.02 | $0.08 \times 10^{-1}$  | 0                      | $0.09 \times 10^{-1}$  | $14.75 \times 10^{-3}$ | $0.06 \times 10^{-1}$ | $0.11 \times 10^{-1}$  | $9.75 \times 10^{-3}$ | $1.75 \times 10^{-2}$  | $2.45 \times 10^{-2}$  | $8.75 \times 10^{-3}$ | $9.75 \times 10^{-3}$ | $0.07 \times 10^{-1}$ | $0.04 \times 10^{-1}$ | $8.25 \times 10^{-3}$ |
| 9     |     |                        |      |      |                        |                        |                        |                        |                       |                        |                       |                        |                        |                       |                       |                       |                       |                       |
| PCB19 | 0.2 | 0.06                   | 0.60 | 0.14 | 0                      | 0                      | $0.28 \times 10^{-1}$  | $0.48 \times 10^{-1}$  | $8.45 \times 10^{-2}$ | $3.35 \times 10^{-2}$  | $5.25 \times 10^{-2}$ | $0.44 \times 10^{-1}$  | $9.65 \times 10^{-2}$  | $0.69 \times 10^{-1}$ | $1.95 \times 10^{-2}$ | $0.15 \times 10^{-1}$ | $0.16 \times 10^{-1}$ | $0.59 \times 10^{-1}$ |
| 5     |     |                        |      |      |                        |                        |                        |                        |                       |                        |                       |                        |                        |                       |                       |                       |                       |                       |
| PCB20 | 0.1 | $2.89 \times 10^{-1}$  | 0.91 | 0.38 | 0.11                   | 0.25                   | 0                      | $1.14 \times 10^{-1}$  | $1.56 \times 10^{-1}$ | $0.71 \times 10^{-1}$  | $4.46 \times 10^{-1}$ | $1.44 \times 10^{-1}$  | 0.34                   | $0.74 \times 10^{-1}$ | $0.66 \times 10^{-1}$ | 0.14                  | 0.12                  | $0.85 \times 10^{-1}$ |
| 6     |     |                        |      |      |                        |                        |                        |                        |                       |                        |                       |                        |                        |                       |                       |                       |                       |                       |
| PCB20 | 0.3 | 0                      | 0.45 | 0.43 | 0                      | 0                      | 0                      | 0                      | 0                     | $46.37 \times 10^{-2}$ | 0.77                  | 0                      | $47.87 \times 10^{-2}$ | 0                     | 0.42                  | 0                     | 0                     | 0                     |
| 9     |     |                        |      |      |                        |                        |                        |                        |                       |                        |                       |                        |                        |                       |                       |                       |                       |                       |
| PCBs  |     | $63.11 \times 10^{-2}$ | 4.16 | 1.27 | $16.75 \times 10^{-2}$ | $32.24 \times 10^{-2}$ | $11.47 \times 10^{-2}$ | $30.3 \times 10^{-2}$  | $10.1 \times 10^{-1}$ | $64.85 \times 10^{-2}$ | 1.67                  | $37.74 \times 10^{-2}$ | 2.04                   | 0.46                  | 0.67                  | 0.23                  | 0.23                  | 0.42                  |
